# Supplementary material
Source: PubMed Central journal article supplement (PMC6734935)

**Supplementary Table 1: Characteristics of the included studies**

| Study group | Country | Enrollment period, median (range) | Original sample size | Sample size included in analysis <sup>1</sup> | Participation response rates of cases (%) |
|-------------|---------|-----------------------------------|----------------------|-----------------------------------------------|-------------------------------------------|
| CAPUA       | Spain   | 2003 (2000-2010)                  | 862                  | 862                                           | 91%                                       |
| CARET       | USA     | 1991 (1985-1994)                  | 2,236                | 998                                           | 80%                                       |
| ESTHER      | Germany | 2002 (2001-2004)                  | 201                  | 104                                           | 50%                                       |
| Fudan       | China   | 2012 (2009-2013)                  | 1,913                | 1,806                                         | 95%                                       |
| Harvard     | USA     | 2004 (1992-2011)                  | 3,411                | 3,411                                         | 83%                                       |
| Hawaii      | USA     | 1994 (1991-1997)                  | 535                  | 535                                           | 67%                                       |
| Japan       | Japan   | 2004 (1997-2008)                  | 1,512                | 1,495                                         | 98%                                       |
| Karmanos    | USA     | 2002 (1999-2005)                  | 913                  | 890                                           | 52%                                       |
| LLP         | England | 2009 (1996-2013)                  | 451                  | 346                                           | 80%                                       |
| Los Angeles | USA     | 2001 (1999-2003)                  | 610                  | 391                                           | 62%                                       |
| Mayo        | USA     | 2006 (1997-2014)                  | 17,034               | 12,332                                        | 74%                                       |
| MD Anderson | USA     | 2010 (2008-2012)                  | 746                  | 745                                           | 90%                                       |
| NIH         | USA     | 2006 (1993-2015)                  | 1,699                | 1,479                                         | 40%                                       |
| ReSoLuCENT  | England | 2009 (2001-2013)                  | 545                  | 545                                           | 33%                                       |
| TLC-Moffit  | USA     | 2011 (2001-2013)                  | 744                  | 744                                           | 82%                                       |
| Toronto     | Canada  | 2009 (1974-2013)                  | 2,534                | 2,534                                         | 83%                                       |
| Total       |         | 2006 (1974-2015)                  | 35,946               | 29,217                                        |                                           |

<sup>1</sup>Patients were not included in the analysis if lung cancer type (small cell/non-small cell) or survival data were missing. NA: not available; SD: standard deviation.

**Supplementary Table 2: Summary of Clinical Outcomes**

| Type of Lung Cancer        | Stage           | N      | Median overall survival        |                                                 | Median Survival Rates used for the 7th Edition AJCC <sup>1</sup> |                                    | Median Follow-up Time in years (months) (among censored patients) |
|----------------------------|-----------------|--------|--------------------------------|-------------------------------------------------|------------------------------------------------------------------|------------------------------------|-------------------------------------------------------------------|
|                            |                 |        | All patients in years (months) | Patients diagnosed since 2000 in years (months) | Pathologic Staging in years (months)                             | Clinical Staging in years (months) |                                                                   |
| Non-small cell lung cancer | All stages      | 26,430 | 2.3 (28)                       | 2.3 (28)                                        | Not applicable                                                   | Not applicable                     | 3.9 years (47 months)                                             |
|                            | 1A              | 5,478  | 9.2 (110)                      | 9.3 (112)                                       | 9.0 (119)                                                        | 5.0 (60)                           | 4.3 years (52 months)                                             |
|                            | 1B              | 2,448  | 7.1 (85)                       | 7.4 (89)                                        | 6.8 (81)                                                         | 3.6 (43)                           | 4.8 years (58 months)                                             |
|                            | 2A              | 1,131  | 5.3 (63)                       | 5.8 (69)                                        | 4.1 (49)                                                         | 2.8 (34)                           | 3.8 years (46 months)                                             |
|                            | 2B              | 1,884  | 3.3 (40)                       | 3.3 (40)                                        | 2.6 (31)                                                         | 2.8 (18)                           | 4.0 years (48 months)                                             |
|                            | 3A              | 3,905  | 2.3 (28)                       | 2.3 (30)                                        | 1.8 (22)                                                         | 1.2 (14)                           | 3.4 years (41 months)                                             |
|                            | 3B              | 2,434  | 1.4 (17)                       | 1.4 (17)                                        | 1.1 (13)                                                         | 0.8 (10)                           | 3.2 years (28 months)                                             |
|                            | 4               | 9,150  | 0.9 (11)                       | 0.9 (11)                                        | 1.4 (17)                                                         | 0.5 (6)                            | 2.4 years (29 months)                                             |
| Small cell lung cancer     | All stages      | 2,787  | 1.0 (12)                       | 1.0 (12)                                        | Not applicable <sup>2</sup>                                      | Not applicable                     | 3.0 years (26 months)                                             |
|                            | Limited stage   | 1,135  | 1.5 (18)                       | 1.5 (18)                                        | Not applicable <sup>2</sup>                                      | 1- 2.5 (12-30) (IIIB-IA)           | 3.3 years (40 months)                                             |
|                            | Extensive stage | 1,652  | 0.8 (9)                        | 0.8 (9)                                         | Not applicable <sup>2</sup>                                      | 0.7 (7) (IV)                       | 1.8 years (22 months)                                             |

<sup>1</sup>Goldstraw P, Crowley J, Chansky K et al (2007) The IASLC lung cancer staging project: proposals for the revision of the TNM stage groupings in the forthcoming (seventh) edition of the TNM classification of malignant tumours. *J Thoracic Oncol* 2(8):706–714. <sup>2</sup> Small cell lung cancer patients are generally not resected; thus no pathologic staging is possible.

**Supplementary Table 3: Sensitivity Analyses**

| Variable                                      | Total Study Cohort  | Exclusion of trial with no staging data | Exclusion of trials with SEER staging data | Exclusion of the single largest dataset | Exclusion of Asian trials   | Exclusion of patients with no cumulative smoking data <sup>b</sup> | Exclusion of Patients diagnosed before the year 2000 |                             |
|-----------------------------------------------|---------------------|-----------------------------------------|--------------------------------------------|-----------------------------------------|-----------------------------|--------------------------------------------------------------------|------------------------------------------------------|-----------------------------|
| <b>Non-Small Cell Lung Cancer</b>             |                     |                                         |                                            |                                         |                             |                                                                    |                                                      |                             |
| No. of patients <sup>a</sup>                  | N                   | 22,950                                  | 22,599                                     | 21,671                                  | 12,073                      | 19,667                                                             | 15,489                                               | 14,065                      |
| BMI at diagnosis, continuous variable         | HR (95%CI); p-value | 0.98 (0.98-0.99)<br>p<0.001             | 0.98 (0.98-0.99)<br>p<0.001                | 0.98 (0.98-0.99)<br>p<0.001             | 0.98 (0.97-0.98)<br>p<0.001 | 0.98 (0.98-0.99)<br>p<0.001                                        | 0.98 (0.98-0.99)<br>p<0.001                          | 0.98 (0.98-0.99)<br>p<0.001 |
| Underweight vs Normal BMI; at diagnosis       |                     | 1.56 (1.4-1.7)<br>p<0.001               | 1.57 (1.4-1.7)<br>p<0.001                  | 1.52 (1.4-1.7)<br>p<0.001               | 1.47 (1.3-1.6)<br>p<0.001   | 1.58 (1.4-1.7)<br>p<0.001                                          | 1.62 (1.5-1.8)<br>p<0.001                            | 1.57 (1.4-1.7)<br>p<0.001   |
| Overweight vs Normal BMI; at diagnosis        |                     | 0.89 (0.85-0.93)<br>p<0.001             | 0.89 (0.85-0.93)<br>p<0.001                | 0.89 (0.85-0.93)<br>p<0.001             | 0.87 (0.83-0.92)<br>p<0.001 | 0.89 (0.85-0.93)<br>p<0.001                                        | 0.89 (0.85-0.94)<br>p<0.001                          | 0.90 (0.85-0.94)<br>p<0.001 |
| Obese vs Normal BMI; at diagnosis             |                     | 0.88 (0.83-0.92)<br>p<0.001             | 0.88 (0.84-0.93)<br>p<0.001                | 0.88 (0.83-0.93)<br>p<0.001             | 0.83 (0.78-0.89)<br>p<0.001 | 0.88 (0.84-0.92)<br>p<0.001                                        | 0.89 (0.84-0.94)<br>p<0.001                          | 0.89 (0.84-0.95)<br>p<0.001 |
| BMI at young adulthood, continuous variable   |                     | 1.00 (0.99-1.01)<br>p=0.83              | 1.00 (0.99-1.01)<br>p=0.73                 | 1.00 (1.00-1.01)<br>p=0.32              | 1.00 (0.99-1.01)<br>p=0.83  | 1.00 (0.99-1.01)<br>p=0.83                                         | 1.00 (0.99-1.01)<br>p=1.00                           | 1.00 (0.99-1.01)<br>p=0.63  |
| Underweight vs Normal BMI; in young adulthood |                     | 1.15 (1.0-1.31)<br>p=0.042              | 1.14 (0.99-1.3)<br>p=0.07                  | 1.09 (0.94-1.25)<br>p=0.25              | 1.15 (1.0-1.31)<br>p=0.04   | 1.15 (1.0-1.31)<br>p=0.04                                          | 1.24 (1.04-1.48)<br>p=0.02                           | 1.04 (0.9-1.21)<br>p=0.59   |
| Overweight vs Normal BMI; in young adulthood  |                     | 0.98 (0.9-1.07)<br>p=0.69               | 0.99 (0.91-1.08)<br>p=0.82                 | 0.96 (0.88-1.06)<br>p=0.43              | 0.98 (0.9-1.07)<br>p=0.69   | 0.98 (0.9,1.07)<br>p=0.69                                          | 0.97 (0.87-1.07)<br>p=0.49                           | 0.95 (0.86-1.04)<br>p=0.25  |
| Obese vs Normal BMI; in young adulthood       |                     | 1.09 (0.96-1.24)<br>p=0.20              | 1.1 (0.96-1.25)<br>p=0.16                  | 1.14 (0.99-1.3)<br>p=0.07               | 1.09 (0.96-1.24)<br>p=0.20  | 1.09 (0.96,1.24)<br>p=0.20                                         | 1.06 (0.92-1.22)<br>p=0.43                           | 1.12 (0.97-1.29)<br>p=0.13  |
| Increase in BMI vs Decrease in BMI            |                     | 0.81 (0.75-0.87)<br>p<0.001             | 0.81 (0.75-0.88)<br>p<0.001                | 0.78 (0.72-0.84)<br>p<0.001             | 0.81 (0.75-0.87)<br>p<0.001 | 0.81 (0.75-0.87)<br>p<0.001                                        | 0.82 (0.75-0.90)<br>p<0.001                          | 0.77 (0.71-0.84)<br>p<0.001 |
| <b>Small Cell Lung Cancer</b>                 |                     |                                         |                                            |                                         |                             |                                                                    |                                                      |                             |
| No. of patients <sup>a</sup>                  | N                   | 2,787                                   | 2,748                                      | 2,646                                   | 975                         | 2,773                                                              | 2,340                                                | 1,159                       |
| BMI at diagnosis, continuous variable         | HR (95%CI); p-value | 1.00 (0.99-1.01)<br>p=0.52              | 1.00 (0.99-1.01)<br>p=0.63                 | 1.00 (0.99-1.01)<br>p=0.5               | 1.01 (0.99-1.02)<br>p=0.43  | 1.00 (0.99-1.01)<br>p=0.52                                         | 1.00 (0.99-1.01)<br>p=0.52                           | 1.00 (0.99-1.01)<br>p=0.88  |
| Underweight vs Normal BMI; at diagnosis       |                     | 1.17 (0.88-1.6)<br>p=0.27               | 1.17 (0.88-1.6)<br>p=0.27                  | 1.2 (0.88-1.6)<br>p=0.25                | 1.18 (0.75-1.9)<br>p=0.48   | 1.17 (0.88-1.6)<br>p=0.27                                          | 1.17 (0.88-1.6)<br>p=0.27                            | 1.20 (0.85-1.7)<br>p=0.31   |
| Overweight vs Normal BMI; at diagnosis        |                     | 0.96 (0.86-1.1)<br>p=0.44               | 0.95 (0.85-1.1)<br>p=0.44                  | 0.95 (0.85-1.1)<br>p=0.39               | 0.91 (0.76-1.1)<br>p=0.28   | 0.96 (0.86-1.1)<br>p=0.44                                          | 0.96 (0.86-1.1)<br>p=0.44                            | 0.96 (0.84-1.1)<br>p=0.60   |
| Obese vs Normal BMI; at diagnosis             |                     | 1.07 (0.94-1.2)<br>p=0.33               | 1.07 (0.93-1.2)<br>p=0.40                  | 1.07 (0.93-1.2)<br>p=0.35               | 1.1 (0.88-1.4)<br>p=0.41    | 1.07 (0.94-1.2)<br>p=0.33                                          | 1.07 (0.94-1.2)<br>p=0.33                            | 1.02 (0.88-1.2)<br>p=0.76   |
| BMI at young adulthood, continuous variable   |                     | 1.01 (0.98-1.03)<br>p=0.72              | 1.00 (0.97-1.03)<br>p=1                    | 1.01 (0.98-1.04)<br>p=0.63              | 1.01 (0.98-1.03)<br>p=0.72  | 1.01 (0.98-1.03)<br>p=0.72                                         | 1.01 (0.98-1.03)<br>p=0.72                           | 1.01 (0.97-1.04)<br>p=0.68  |
| Underweight vs Normal BMI; in young adulthood |                     | 1.44 (0.87-2.39)<br>p=0.16              | 1.43 (0.84-2.41)<br>p=0.18                 | 1.15 (0.58-2.3)<br>p=0.69               | 1.44 (0.87-2.39)<br>p=0.16  | 1.44 (0.87-2.39)<br>p=0.16                                         | 1.44 (0.87-2.39)<br>p=0.16                           | 1.14 (0.57-2.27)<br>p=0.71  |
| Overweight vs Normal BMI; in young adulthood  |                     | 1.10 (0.82-1.49)<br>p=0.52              | 1.03 (0.75-1.42)<br>p=0.84                 | 1.12 (0.78-1.59)<br>p=0.54              | 1.10 (0.82-1.49)<br>p=0.52  | 1.10 (0.82-1.49)<br>p=0.52                                         | 1.10 (0.82-1.49)<br>p=0.52                           | 1.07 (0.75-1.55)<br>p=0.70  |
| Obese vs Normal BMI; in young adulthood       |                     | 1.23 (0.80-1.91)<br>p=0.35              | 1.21 (0.78-1.87)<br>p=0.40                 | 1.25 (0.79-1.99)<br>p=0.34              | 1.23 (0.80-1.91)<br>p=0.35  | 1.23 (0.80-1.91)<br>p=0.35                                         | 1.23 (0.8-1.91)<br>p=0.35                            | 1.22 (0.77-1.94)<br>p=0.39  |
| Increased/Stable BMI vs Decreased BMI         |                     | 0.86 (0.65-1.1)<br>p=0.28               | 0.89 (0.66-1.2)<br>p=0.42                  | 0.85 (0.61-1.2)<br>p=0.33               | 0.86 (0.65-1.1)<br>p=0.28   | 0.86 (0.65-1.1)<br>p=0.33                                          | 0.86 (0.65-1.1)<br>p=0.28                            | 0.88 (0.63-1.2)<br>p=0.48   |

<sup>a</sup>After the exclusion of patients with missing data for the base multivariable model; <sup>b</sup>in this model, pack-years has been added to the model as a continuous predictor variable.

**Supplementary Figure 1: Lung Cancer-Specific Survival:** The hazard ratio of lung cancer free survival based on penalized smoothing spline by body mass index (BMI, kg/m<sup>2</sup>) at lung cancer diagnosis for non-small cell lung cancer

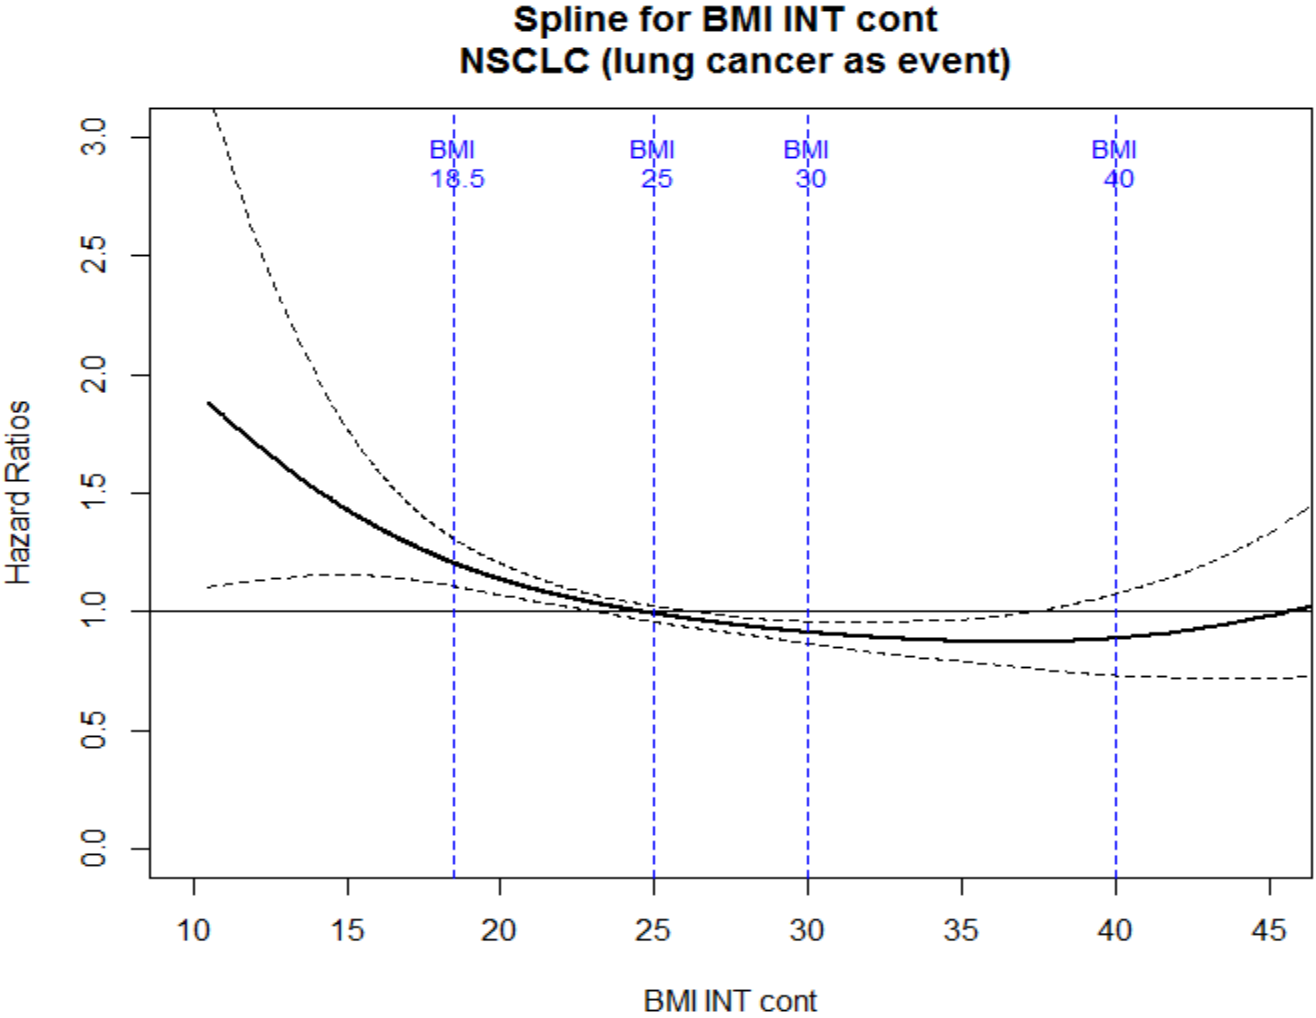

**Supplementary Figure 2:** BMI at diagnosis (divided into categories) versus overall survival in subsets of patients defined by clinico-demographic characteristics.

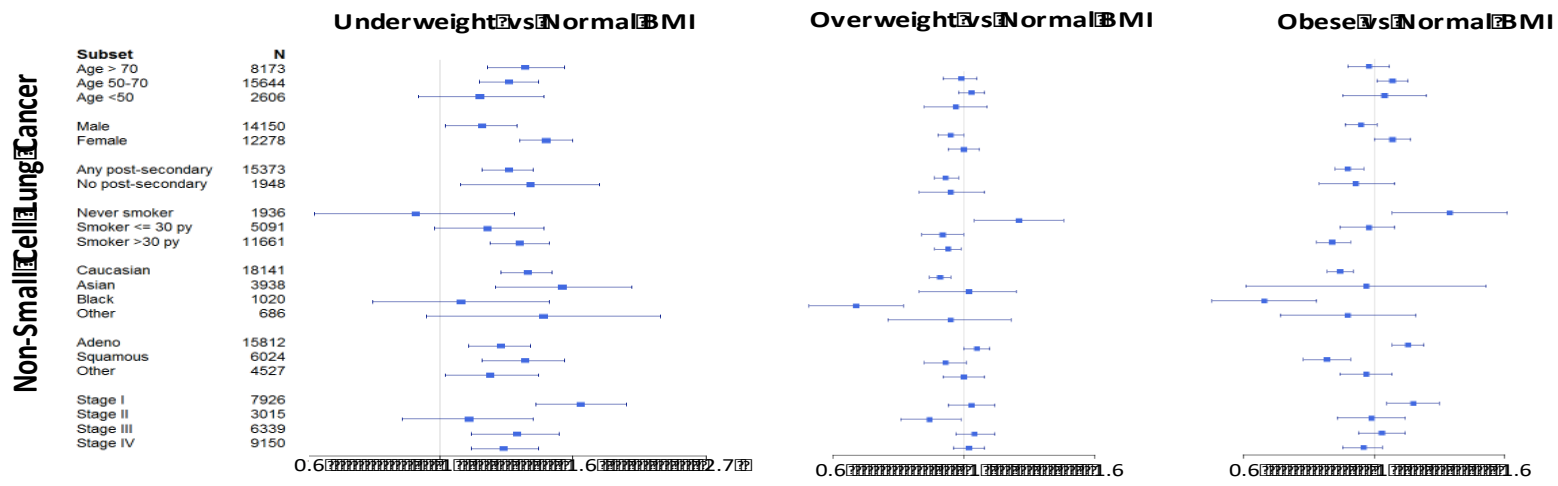

Hazard Ratios and 95% confidence intervals

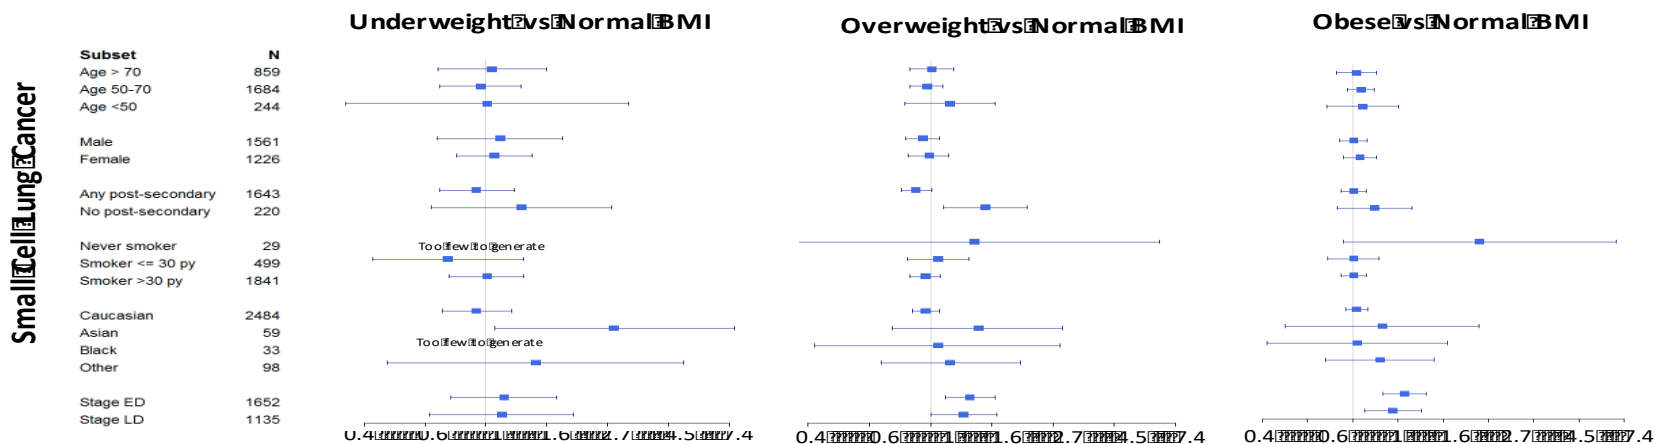

Hazard Ratios and 95% confidence intervals

**Supplementary Figure 3: BMI in young adulthood (divided into categories) versus overall survival in subsets of patients defined by clinico-demographic characteristics.**

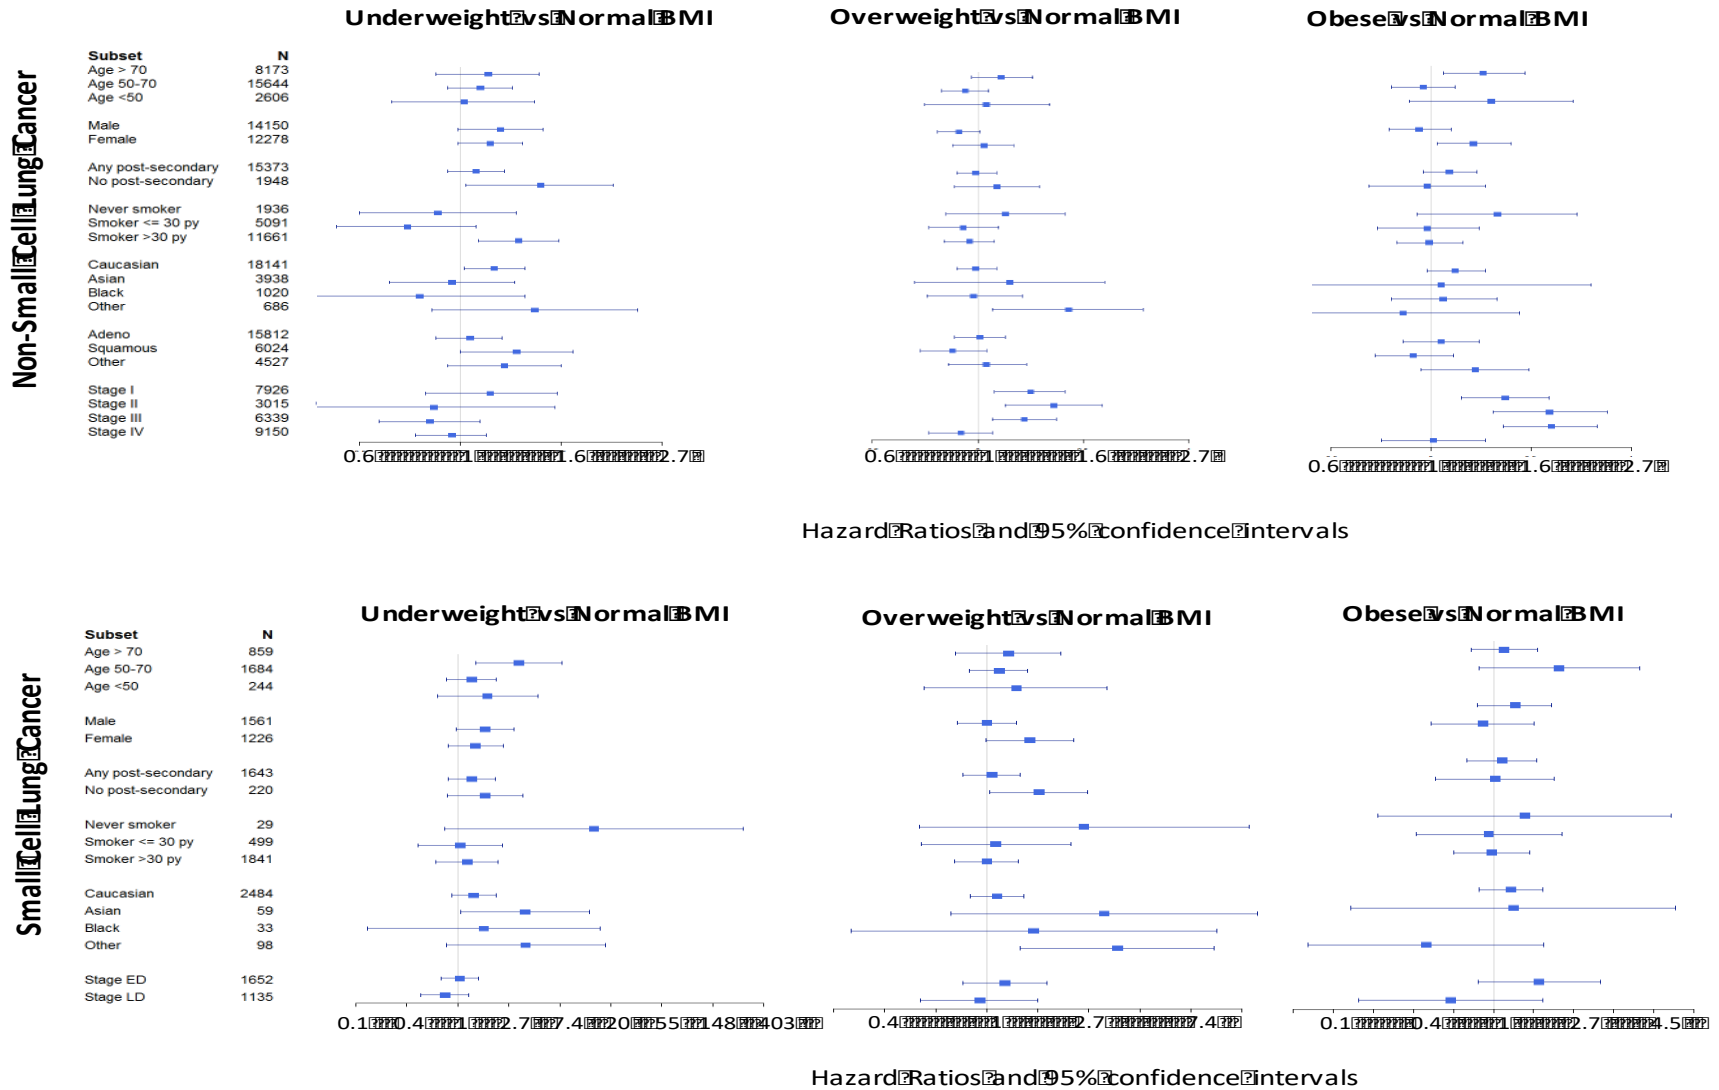

**Supplementary Figure 4:** Change in BMI from young adulthood until time of diagnosis versus overall survival in subsets of patients defined by clinico-demographic characteristics.

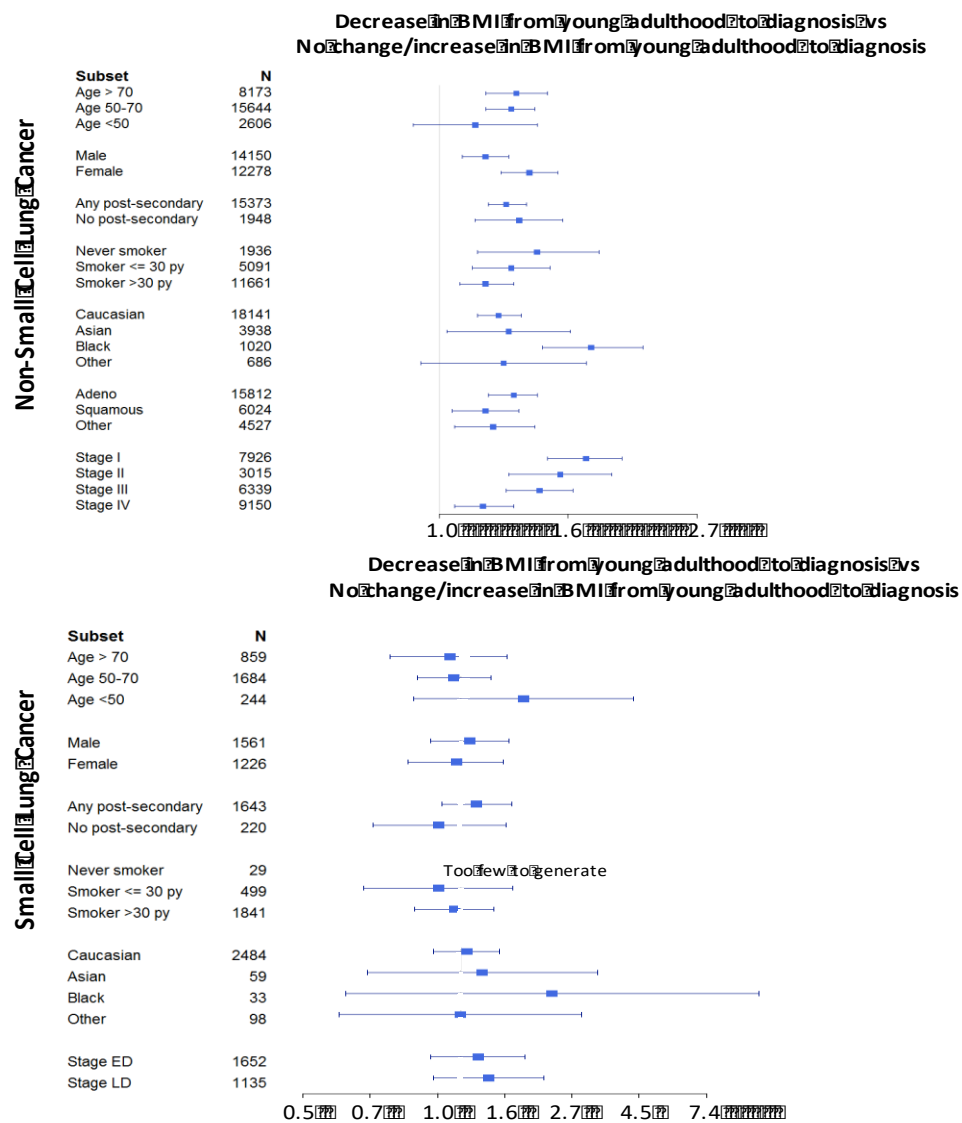

Supplement: NIHMS1037972-supplement-Tables_and_Figures.pdf [file NIHMS1037972-supplement-Tables_and_Figures.pdf]
